# Supplementary material
Source: PubMed Central journal article supplement (PMC6966290)
Supplement: DS_10.1177_1558944718787281.pdf [file DS_10.1177_1558944718787281.pdf]

# Dupuytren's Survey ASSH

Please complete the survey below.

Thank you!

---

---

## Demographic Questions

In what region do you practice?

- 1. New England - Connecticut, Maine, Massachusetts, New Hampshire, Rhode Island or Vermont
- 2. Mid-Atlantic - Delaware, District of Columbia, Maryland, New Jersey, New York or Pennsylvania
- 3. Great Lakes - Illinois, Indiana, Ohio, Michigan or Wisconsin
- 4. Plains - Iowa, Kansas, Minnesota, Missouri, Nebraska, North Dakota or South Dakota
- 5. Southeast - Alabama, Arkansas, Florida, Georgia, Kentucky, Louisiana, Mississippi, North Carolina, South Carolina, Tennessee, Virginia or West Virginia
- 6. Southwest - Arizona, New Mexico, Oklahoma or Texas
- 7. Rocky Mountain - Colorado, Idaho, Montana, Utah or Wyoming
- 8. Far West - Alaska, California, Hawaii, Nevada, Oregon or Washington
- 9. US Territory
- 10. Canada
- 11. Military Post Elsewhere

What type of practice do you have?

- Solo Private Practice
- Group Private Practice
- Mix of Private and Academic
- Academic
- Military

Do you work with residents and/or fellows in your practice?

- 1. Yes, I am part of a faculty that sponsors a residency program (Orthopaedics or Plastics)
- 2. Yes, I have plastic surgery or orthopaedic residents that occasionally rotate with me
- 3. Yes, I have general surgery residents that rotate with me
- 4. Yes, I have hand fellows that work with me
- 5. No, none of the above

What is your age?

- < 30
- 31-35
- 36-40
- 41-45
- 46-50
- 51-55
- 56-60
- 61-65
- > 65

What is your Board Certification?

- Orthopaedic Surgery
- Plastic Surgery
- General Surgery

Was your hand fellowship an orthopaedic, plastic, or general surgery sponsored fellowship?

- General Surgery
- Combined (Orthopaedic and Plastic)
- Orthopaedic
- Plastic Surgery

How many years have you been in practice since fellowship?

- 0-5
- 6-10
- 11-15
- 16-20
- >20

What part of your practice is hand surgery? (wrist to fingertips, elective or otherwise)

- 0
- < 25%
- 25-49%
- 50%
- 51-75%
- 76-95%
- >95%

How many Dupuytren's patients do you see per month? (on average)

- < 5
- 6-10
- 11-20
- 21-50
- >50

---



---

## Needle Aponeurotomy Questions

Do you perform needle aponeurotomy for Dupuytren's contracture?

- Yes  
 No

Where have you performed needle aponeurotomy for Dupuytren's contracture? In the Palm?

yes

no

In the finger?

For a webspace contracture?

Other

Other (please specify)

\_\_\_\_\_

What size needle do you use to cut the cord during a needle aponeurotomy?

- 25 gauge  
 23 gauge  
 21 gauge  
 18 gauge  
 Other

Other (please specify)

\_\_\_\_\_

|                                                                                                                                             | 100% - normal range of motion | 75% - continue with some contracture but markedly improved | 50% - contracture is improved but continued disability | 25% - noticeable but minimal improvement | 0% - no change        | n/a                   |
|---------------------------------------------------------------------------------------------------------------------------------------------|-------------------------------|------------------------------------------------------------|--------------------------------------------------------|------------------------------------------|-----------------------|-----------------------|
| How successful do you feel that your treatment of your average patient treated with needle aponeurotomy is in the immediate post-op period? | <input type="radio"/>         | <input type="radio"/>                                      | <input type="radio"/>                                  | <input type="radio"/>                    | <input type="radio"/> | <input type="radio"/> |
| After 2 years?                                                                                                                              | <input type="radio"/>         | <input type="radio"/>                                      | <input type="radio"/>                                  | <input type="radio"/>                    | <input type="radio"/> | <input type="radio"/> |
| After 5 years?                                                                                                                              | <input type="radio"/>         | <input type="radio"/>                                      | <input type="radio"/>                                  | <input type="radio"/>                    | <input type="radio"/> | <input type="radio"/> |

What percentage of patients in your practice go on to other treatments after needle aponeurotomy?

- 0-25%  
 25-50%  
 50-75%  
 75-100%

What complications have you encountered with needle aponeurotomy?

- None  
 Delayed wound healing  
 Skin tears  
 Dupuytren's "flare"  
 Nerve injury  
 CRPS  
 Other

Other (please specify)

\_\_\_\_\_

---



---

**Collagenase Questions**

Do you treat Dupuytren's patients with collagenase injections?

- Yes  
 No

Where have you injected collagenase for Dupuytren's contracture? in the Palm?

yes

no

In the finger?

For a webspace contracture?

Other

Other (please specify)

\_\_\_\_\_ (please specify)

100% -  
normal range  
of motion

75% -  
continue with  
some flexion  
contracture  
but markedly  
improved

50% -  
contracture is  
improved but  
continued  
disability

25% -  
noticeable but  
minimal  
improvement

0% - no  
change

n/a

How successful do you feel that your treatment of your average patient treated with collagenase is in the immediate post treatment period?

After 2 years?

After 5 years

What percentage of patients in your practice go on to other treatments of Dupuytren's contracture after treatment with collagenase?

- 0 - 25%  
 25 - 50%  
 50 - 75%  
 75 - 100%  
 other

Other (please specify)

How soon do you ask patients to return for manipulation after collagenase injection?

- Next day  
 In 2 days  
 In 3 days  
 In about 7 days  
 Other

Other

How many injections of collagenase do you perform for each digit? (on average)

- 1  
 2  
 3  
 other

Other (please specify)

What complications have you encountered with collagenase?

- None
- Delayed wound healing
- Dupuytren's "flare"
- Nerve injury
- CRPS
- Tendon rupture
- Other

Other (please specify)

---

---



---

**Fasciectomy Questions**

Do you perform fasciectomies for Dupuytren's contracture?

- yes  
 no

What type of fasciectomy do you routinely perform?

- Limited  
 Radical  
 Open Palm  
 Other

Other (please specify) \_\_\_\_\_

|                                                                                                                                            | 100% -<br>normal range<br>of motion | 75% -<br>continue with<br>some flexion<br>contracture<br>but markedly<br>improved | 50% -<br>contracture is<br>improved but<br>continued<br>disability | 25% -<br>noticeable but<br>minimal<br>improvement | 0% - no<br>change     | n/a                   |
|--------------------------------------------------------------------------------------------------------------------------------------------|-------------------------------------|-----------------------------------------------------------------------------------|--------------------------------------------------------------------|---------------------------------------------------|-----------------------|-----------------------|
| How successful do you feel that your treatment of your average patient treated with fasciectomy is in the immediate post treatment period? | <input type="radio"/>               | <input type="radio"/>                                                             | <input type="radio"/>                                              | <input type="radio"/>                             | <input type="radio"/> | <input type="radio"/> |
| After 2 years?                                                                                                                             | <input type="radio"/>               | <input type="radio"/>                                                             | <input type="radio"/>                                              | <input type="radio"/>                             | <input type="radio"/> | <input type="radio"/> |
| After 5 years?                                                                                                                             | <input type="radio"/>               | <input type="radio"/>                                                             | <input type="radio"/>                                              | <input type="radio"/>                             | <input type="radio"/> | <input type="radio"/> |

What percentage of your patients require subsequent treatment for Dupuytren's contracture after fasciectomy?

- 0-25%  
 25-50%  
 50-75%  
 75-100%  
 other

Other (please specify) \_\_\_\_\_

What complications have you encountered with fasciectomy?

- None  
 Delayed wound healing  
 Nerve injury  
 Hematoma  
 CRPS  
 Other

Other (please specify) \_\_\_\_\_

---



---

**General Questions**

What is your preferred treatment for primary Dupuytren's contracture involving only the MP joint?

- Needle aponeurotomy  
 Collagenase injection  
 Limited fasciectomy  
 Radical fasciectomy with skin graft  
 Open palm  
 Other

Other (please specify)

\_\_\_\_\_

What is your preferred treatment for primary Dupuytren's contracture involving both the MP and PIP joints?

- Needle aponeurotomy  
 Collagenase injection  
 Limited fasciectomy  
 Radical fasciectomy with skin graft  
 Open palm  
 Other

Other (please specify)

\_\_\_\_\_

What is your preferred treatment for secondary Dupuytren's contracture (recurrent or continued contracture) involving only the MP joint?

- Needle aponeurotomy  
 Collagenase injection  
 Limited fasciectomy  
 Radical fasciectomy with skin graft  
 Open palm  
 Other

Other (please specify)

\_\_\_\_\_

What is your preferred treatment for secondary Dupuytren's contracture (recurrent or continued contracture) involving both the MP and PIP joints?

- Needle aponeurotomy  
 Collagenase injection  
 Limited fasciectomy  
 Radical fasciectomy with skin graft  
 Open palm  
 Other

Other (please specify)

\_\_\_\_\_

Do you feel that there is sufficient evidence to support the treatment of Dupuytren's contracture with collagenase injections?

- yes  
 no  
 other

Other (please specify)

\_\_\_\_\_

Do you think that the cost of collagenase injections is worth the benefit?

- yes  
 no

Please comment

\_\_\_\_\_

Would you perform more collagenase injections if the cost was lower?

- Yes  
 No

In your opinion, which treatment is best for a patient with Dupuytren's contracture that is amenable to any listed?

- Needle aponeurotomy  
 Collagenase injection  
 Fasciectomy  
 Other

Other (please specify)

\_\_\_\_\_

In your opinion, which treatment most likely offers the longest disease-free survival?

- Needle aponeurotomy
- Collagenase injection
- Fasciectomy
- Other

Other (please specify)

---

Which intervention would you typically recommend for a young, gainfully employed patient with a dominant ring finger MCP contracture of 50 degrees and PIP contracture of 20 degrees?

- Needle aponeurotomy
- Collagenase injection
- Fasciectomy
- Other

Other (please specify)

---

Which intervention would you typically recommend for an 85-year-old retired patient with a dominant ring finger MCP contracture of 50 degrees and PIP contracture of 20 degrees?

- Needle aponeurotomy
- Collagenase injection
- Fasciectomy
- Other

Other (please specify)

---
